# Supplementary material
Source: PubMed Central journal article supplement (PMC2955119)
Supplement: 1012977107_pnas.201012977SI.pdf [file 1012977107_pnas.201012977SI.pdf]

# Supporting Information

Miyake et al. 10.1073/pnas.1012977107

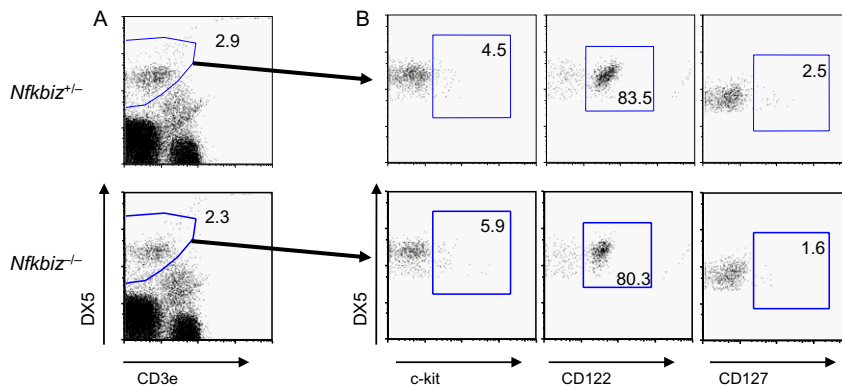

**Fig. S1.** Splenic NK cells from *Nfkbiz*<sup>-/-</sup> mice develop normally. (A) Splenocytes from *Nfkbiz*<sup>-/-</sup> and control *Nfkbiz*<sup>+/-</sup> mice were stained for DX5 and CD3e followed by flow cytometry. The gate indicates DX5<sup>+</sup>CD3e<sup>-</sup> NK cells and the numbers indicate percentages of NK cells in total splenocytes. (B) Splenic DX5<sup>+</sup>CD3e<sup>-</sup> NK cells were examined for the expression of c-kit (CD117), CD122 (IL-2 and IL-15 receptor), and CD127 (IL-7 receptor). The numbers indicate the percentages of gated population in splenic NK cells. The data are representative of two independent experiments.

## Other Supporting Information Files

[Dataset S1 \(XLS\)](#)
